# Supplementary material for: The Austrian Osteopathic Practitioners Estimates and RAtes (OPERA): a cross-sectional survey
Source: Research Square preprint supplement (doi:10.21203/rs.3.rs-1140980/v1), 2021-12-13
Supplement: Supplementary file 2 [file 7032fe61c9ade05e6f69b41f.docx]

**Supplementary Table 3:** Osteopathic training and life-long learning characteristics (n= 338).

| **Descriptor** | **Variable** | **n** | **%** |
| --- | --- | --- | --- |
| **Type of training** | Part-time | 331 | 97.9 |
| Full-time | 7 | 2.1 |
| **Duration of the training** | 3 years | 1 | 0.3 |
| 4 years | 5 | 1.5 |
| 5 years | 74 | 21.9 |
| 6 years | 97 | 28.7 |
| >6 years | 161 | 47.6 |
| **Type of osteopathic academic**  **qualification** | Diploma Osteopathy (DO) | 113 | 33.4 |
| Bachelor (Graduate) | 6 | 1.8 |
| Master | 131 | 38.8 |
| PhD | 0 | 0.0 |
| **Continuous Professional**  **Development (CPD)** | Yes | 302 | 89.4 |
| No | 36 | 10.7 |
| **Previous qualification(s)** | Massage therapist | 31 | 7.4 |
| Medical doctor | 23 | 5.5 |
| Nurse | 4 | 1.0 |
| Physiotherapist | 301 | 71.5 |
| Chiropractor | 1 | 0.2 |
| Sport scientist | 10 | 2.4 |
| Other healthcare training | 16 | 8.1 |
| No prior training | 1 | 0.2 |
