# Supplementary material for: The Austrian Osteopathic Practitioners Estimates and RAtes (OPERA): a cross-sectional survey
Source: Research Square preprint supplement (doi:10.21203/rs.3.rs-1140980/v1), 2021-12-13
Supplement: Supplementary file 9 [file 8ef714e5ec90ac991b48f9be.docx]

**Supplementary Table 2:** Other professional activities.

| **Activity** | **n** | **%** |
| --- | --- | --- |
| clinical physician | 22 | 9.0 |
| clinical physiotherapist | 126 | 51.2 |
| other healthcare practitioner | 9 | 4.0 |
| lecturing osteopathic courses in learning | 27 | 11.0 |
| supervising osteopathic clinical trainees | 26 | 11.0 |
| supervising osteopathic research dissertations | 5 | 2.0 |
| researchers | 0 | 0.0 |
| work for a professional osteopathic regulatory body or association | 7 | 2.9 |
| other professional activities | 24 | 9.8 |
