# Supplementary figures and images for: The Austrian Osteopathic Practitioners Estimates and RAtes (OPERA): a cross-sectional survey
Source: Research Square preprint supplement (doi:10.21203/rs.3.rs-1140980/v1), 2021-12-13

**Supplementary Figure 1:** Team members working with osteopaths.


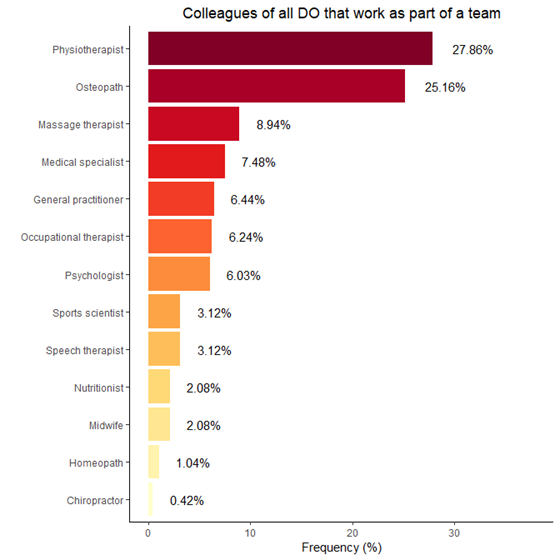

Supplement: Supplementary file 6 [file cc00e9d77234723d27814406.docx]
